# Supplementary material
Source: Springer Nature journal article supplement (https://www.springermedizin.de/resource/supplementary/12936_2012_2700_MOESM6_ESM.docx/9545148)
Supplement: MOESM6 [file 9545148]

| Table 5: CHW field visits. n=19 | n (%) |
| --- | --- |
| Villages where RDTs were expired or unavailable on day of visit | 14 (74) |
| Villages where ACTs were expired or unavailable on day of visit | 13 (68) |
| CHW workers who maintained an accurate register | 16 (84) |
| CHW that maintained a supply stock management sheet | 9 (48) |
| Villages where RDTs were provided free of charge | 19 (100) |
| Villages where pricing of ACTs was correct | 19 (100) |
| Villages where CHWs organized educational activities on malaria | 11 (58) |
